1 **Title:**

2

3 A flexible microfluidic system for single-cell transcriptome profiling elucidates phased  
4 transcriptional regulators of cell cycle

5

6 **Authors:**

7

8 Karen Davey<sup>§, 1</sup>, Daniel Wong<sup>§, 2</sup>, Filip Konopacki<sup>2</sup>, Eugene Kwa<sup>1</sup>, Heike Fiegler<sup>2</sup>, Christopher  
9 R. Sibley<sup>\*, 1, 3</sup>

10

11 <sup>§</sup> = Contributed equally

12 <sup>\*</sup> = Corresponding author

13

14 **Affiliations:**

15

16 <sup>1</sup> Department of Medicine, Division of Brain Sciences, Imperial College London, Burlington  
17 Danes, London, United Kingdom

18

19 <sup>2</sup> Dolomite Bio, Unit 3, Anglian Business Park, Royston, United Kingdom

20

21 <sup>3</sup> Institute of Quantitative Biology, Biochemistry and Biotechnology, School of Biological  
22 Sciences, 1 George Square, Edinburgh University, EH8 9JZ, United Kingdom

23

24 **Correspondence:**

25

26 Dr Christopher R. Sibley

27 Institute of Quantitative Biology, Biochemistry and Biotechnology

28 School of Biological Sciences

29 1 George Square

30 Edinburgh University

31 Edinburgh

32 EH8 9JZ

33 United Kingdom

34

35 [chris.sibley@ed.ac.uk](mailto:chris.sibley@ed.ac.uk)

36

37 **Keywords:** single cell, drop-seq, droNc-seq, sNuc-seq, regulatory networks, cell cycle

38 **Summary:** Single cell transcriptome profiling has emerged as a breakthrough technology for  
39 the high-resolution understanding of complex cellular systems. Here we report a flexible, cost-  
40 effective and user-friendly droplet-based microfluidics system, called the Nadia Instrument,  
41 that can allow 3' mRNA capture of ~50,000 single cells or individual nuclei in a single run.  
42 The precise pressure-based system demonstrates highly reproducible droplet size, low  
43 doublet rates and high mRNA capture efficiencies that compare favorably in the field.  
44 Moreover, when combined with the Nadia Innovate, the system can be transformed into an  
45 adaptable setup that enables use of different buffers and barcoded bead configurations to  
46 facilitate diverse applications. Finally, by 3' mRNA profiling asynchronous human and mouse  
47 cells at different phases of the cell cycle, we demonstrate the system's ability to readily  
48 distinguish distinct cell populations and infer underlying transcriptional regulatory networks.  
49 Notably this identified multiple transcription factors that had little or no known link to the cell  
50 cycle (e.g. DRAP1, ZKSCAN1 and CEBPZ). In summary, the Nadia platform represents a  
51 promising and flexible technology for future transcriptomic studies, and other related  
52 applications, at cell resolution.

53 **Introduction:** Single cell transcriptome profiling has recently emerged as a breakthrough  
54 technology for understanding how cellular heterogeneity contributes to complex biological  
55 systems. Indeed, cultured cells, microorganisms, biopsies, blood and other tissues can be  
56 rapidly profiled for quantification of gene expression at cell resolution. Among a wealth of  
57 notable findings, this has led to the unprecedented discovery of new cell populations such as  
58 CFTR-expressing pulmonary ionocytes<sup>1</sup>, new cell subtypes such as the distinct disease-  
59 associated microglia found in both mice<sup>2</sup> and humans<sup>3</sup>, and the single-cell profiling of a whole  
60 multicellular organism<sup>4</sup>.

61  
62 Several technology platforms have been devised for single cell transcriptome profiling that  
63 principally differ in amplification method, capture method, scalability and transcriptome  
64 coverage (reviewed in <sup>5</sup>). Methods with lower cell throughput ( $<10^3$ ) can provide full transcript  
65 coverage permitting analysis of post-transcriptional processing at cell resolution<sup>6-8</sup>. Meanwhile,  
66 3'-digital gene expression (3'-DGE) based technologies focus on the 3' end of mRNA  
67 transcripts to allow a higher throughput ( $>10^4$ ) at reduced cost<sup>4,9-11</sup>. A caveat is that such 3'-  
68 DGE methods principally report gene-level rather than isoform-level expression. However,  
69 recent adaptations allow membrane-bound proteins to be simultaneously monitored alongside  
70 the transcriptome via use of antibody-derived barcoded tags that are captured and  
71 concomitantly sequenced<sup>12,13</sup>.

72  
73 Relevant to this study, droplet-based single-cell RNA-seq is a popular 3'-DGE method that  
74 involves the microfluidics encapsulation of single cells alongside barcoded beads in oil  
75 droplets<sup>9,10</sup>. Cells are subsequently lysed within the droplets and the released polyadenylated  
76 RNA captured by oligos coating<sup>9</sup> or embedded<sup>10</sup> within the beads for 3'-DGE. Since all oligos  
77 associated with a single bead contain the same cellular barcode, an index is provided to the  
78 RNA that later reports on its cellular identity during computational analysis. Meanwhile, unique  
79 molecular identifier (UMI) sequences within the oligos provide each captured RNA with a  
80 transcript barcode such that PCR duplicates can be collapsed following library amplification.  
81 Both custom fabricated<sup>9,10,14,15</sup> and commercial<sup>16,17</sup> microfluidics setups have been developed  
82 for droplet-based workflows. However, user flexibility of these systems remains limited.

83  
84 Here we report a new automated and pressure-based microfluidic droplet-based platform,  
85 called the Nadia Instrument, that encapsulates up to 8 samples, in parallel, in under 20  
86 minutes. Accordingly, this allows 3' mRNA capture of ~50,000 single cells or individual nuclei  
87 in a single run. The Nadia Instrument guides users through all relevant steps of the cell  
88 encapsulation via an easy-to-use touchscreen interface, whilst it maintains complete flexibility  
89 to modify parameters such as droplet size, buffer types, incubation temperatures and bead

90 composition when combined with the Nadia Innovate. We subsequently demonstrate highly  
91 reproducible droplet size, low doublet capture rates and high mRNA capture efficiencies  
92 relative to alternative technologies. Further, we leverage our high quality datasets to elucidate  
93 active transcriptional regulatory networks at different phases of the cell cycle. This revealed  
94 transcription factors such as DRAP1, ZKSCAN1 and CEBPZ, among others, that had little or  
95 no previous association with distinct phases of the cell cycle. Taken together, the integrity and  
96 adaptability of the Nadia platform makes it an attractive and versatile platform for future single  
97 cell applications in which fine-tuning of experimental parameters can lead to improved data  
98 quality.

99

100

## 101 **Results:**

102

103 **An open-platform for flexible single-cell microfluidics:** Droplet-based single-cell RNA-seq  
104 is a scalable and cost-effective method for the simultaneous transcriptome profiling of 100s-  
105 1000s of cells. Here we present the flexible, user-friendly and open Nadia platform that  
106 facilitates high integrity co-encapsulation of single cells in oil droplets together with barcoded  
107 beads (**Figure 1A-C**). Unlike other custom or commercial systems that depend on mechanical  
108 injection, the Nadia employs three pressure-driven pumps to deliver smooth and readily  
109 manipulated liquid flows of cell suspensions, barcoded beads and oil into the platform's  
110 microfluidics cartridges (**Figure 1B-C**). Successful co-encapsulation of single cells with  
111 individual beads subsequently represents the start point for cDNA library preparation. Between  
112 1-8 samples can be processed in parallel on the Nadia due to the flexible configuration of the  
113 machines inserted cartridge (**Supplementary figure 1**), whilst incorporated magnetic stir bars  
114 and cooling elements ensure samples remain evenly in suspension and temperature  
115 controlled throughout. A touch interface guides the user through all essential experimental  
116 steps, whilst optional integration of the paired 'Innovate' device provides the user with total  
117 flexibility to modify all parameters of each run (**Figure 1A**). Accordingly, new protocols can  
118 subsequently be rapidly developed, saved and shared for future application by both the user  
119 and the wider research community. Further, no wetted parts and disposable cartridges reduce  
120 risk of cross-experiment contamination.

121

122 As with related microfluidic setups, single cell suspensions and barcoded beads are loaded at  
123 limiting dilutions to ensure minimal occurrence of more than one cell in the same droplet with  
124 a bead (**Figure 1C**). Following cell and bead co-encapsulation, the oil droplets act as  
125 chambers for cell lysis and mRNA capture. Current injection-based microfluidics systems have  
126 been restricted to single droplet sizes<sup>16</sup>, or require custom microfluidics chips designed for

127 purpose<sup>9,14</sup>. However, retaining the ability to fine-tune droplet volumes could concentrate RNA  
128 around oligo bound capture beads for increased mRNA capture, and allow droplet parameters  
129 to be optimised according to cell dimensions, buffers or the capture beads used. Exemplifying  
130 this, whilst original reports used ~125 µm diameter droplets for transcriptome profiling whole  
131 cells<sup>9</sup>, Habib et al. optimised a microfluidics chip for ~85 µm diameter droplet generation that  
132 facilitated single-nuclei sequencing of archived human brain tissue<sup>14</sup>. Due to the smooth  
133 pressure-based system employed, and unlike other platforms, droplet manipulation is readily  
134 achieved with the Nadia and accompanying Innovate. Indeed, droplets can be generated over  
135 a range of sizes from as little as ~40 µm (**Figure 1D, E**). Moreover, this can be achieved using  
136 the same microfluidics cartridge for all droplet sizes, thus negating the need for custom chip  
137 design between experiments. Crucially, resulting droplets are uniform in size (**Figure 1E, F**).  
138 Meanwhile, reducing droplet size from ~85 µm to ~60 µm ( $p < 0.05$ , **Figure 1F**) resulted in  
139 increased RNA capture from mouse 3T3 nuclei (**Figure 1G**).

140  
141 Beyond droplet size control, current droplet-sequencing protocols have principally reported  
142 use of two oligonucleotide bound beads; non-deformable beads<sup>9</sup>, and deformable  
143 hydrogels<sup>16,18</sup>. Non-deformable beads have the advantage that mRNA-bound beads can be  
144 pooled prior to reverse transcription and minimise reagent costs. In contrast, deformable  
145 beads, including those used in commercial platforms<sup>16</sup>, require the reverse transcription  
146 reaction to be performed within the droplets to ensure cellular barcodes remain specific to a  
147 single cell following oligo release from the hydrogel surface. A reverse transcription mix must  
148 thus constitute one of the three streams entering the microfluidics setup which can increase  
149 reagent usage. However, whilst droplet-sequencing with non-deformable beads is dependent  
150 on double Poisson loading constraints that restricts bead encapsulation to <20%, deformable  
151 hydrogels can be efficiently synchronized such that 70-100% of droplets contain a single  
152 bead<sup>16,18</sup>. Whilst the bead configuration is dependent on the application in question, the Nadia  
153 importantly retains flexibility to use both non-deformable and deformable beads unlike other  
154 platforms<sup>19</sup>. Indeed, whilst non-deformable beads have been used for datasets presented  
155 herein, acrylamide/bis-acrylamide deformable beads are fully compatible and allow successful  
156 bead stacking behind the microfluidics junction to facilitate synchronised loading of >70% of  
157 droplets (**Figure 1H**).

158  
159 Similar flexibility is provided in the ability to incorporate different buffers. Indeed, stable and  
160 mono-dispersed oil droplets are created with a cell/nuclei lysis buffer containing 0.2% sarkosyl  
161 and 6 % of the Ficoll PM-400 sucrose-polymer, and a cytoplasmic lysis buffer containing 0.5%  
162 Igopal CA-630 (**Supplementary figure 1**). Meanwhile, in an alternative application, use of  
163 hydrogel liquid precursors in replace of the bead-containing lysis buffer can allow hydrogel

164 based capture of the cell suspension to create miniaturized and biocompatible niches for three  
165 dimensional *in vitro* cell culture (**Supplementary figure 1**)<sup>20</sup>. Taken together then, the Nadia  
166 provides a flexible setup that allows the user to optimise experimental parameters for specific  
167 purpose.

168

169 **Technical performance for single cell and single nuclei sequencing:** In order to test the  
170 integrity of the Nadia platform, we performed a mixed-species experiment in which a 3:1 mix  
171 of human HEK293 cells and mouse 3T3 cells were subject to droplet capture using the  
172 standard machine parameters. During cDNA library preparation, 2000 beads were processed  
173 into a final library for sequencing. This number would theoretically equate to profiling of 100  
174 cells under double Poisson loading constraints, and just ~1.25% of the total cells collected in  
175 this run. Following sequencing at >100k reads per cell, our analysis with the Drop-seq tools  
176 pipeline<sup>9</sup> revealed we had collected precisely 100 single cell transcriptomes attached to  
177 microparticles (STAMPs). Of these, 75 had mappings primarily to the human genome, and 24  
178 to the mouse genome (**Figure 2A**). Just 1% had mixed mappings that implied capture of more  
179 than two mixed species cells during the microfluidics element of the workflow. Meanwhile,  
180 each single species cell had a mean of 1.52% reads from the alternative species to imply a  
181 low-level of barcode swapping during library preparation. A low doublet capture rate was  
182 maintained when the number of beads used for cDNA library preparation was increased, whilst  
183 increasing the loading density of cells revealed an increase in doublets consistent with the  
184 double Poisson loading of the platform (**Supplementary figure 2**).

185

186 We next produced cDNA libraries from different amounts of barcoded beads to determine  
187 whether STAMP estimates matched the theoretical cell capture of the system. To assess we  
188 evaluated the number of UMI counts associated with cell barcodes, and used subsequent  
189 graph inflection points to estimate the cells captured. Across multiple experiments performed  
190 by independent users at different locations, we saw that the predicted STAMP capture was  
191 well matched to expected cell capture (**Figure 2B**). Further, by comparing UMI and gene  
192 counts to the total read counts for each library, we found that using the Nadia platform resulted  
193 in a high RNA capture efficiency. Indeed this resulted in complex cDNA libraries that had  
194 favorable metrics relative to other custom fabricated<sup>9</sup> (Macosko et al. 2015) and commercial<sup>16</sup>  
195 droplet sequencing platforms for which comparable human HEK293 and mouse 3T3 mixed-  
196 species datasets are available (**Figure 2C-D**).

197

198 High RNA capture efficiency will be critical for profiling low input material such as single nuclei.  
199 Applying such a strategy is necessary when profiling heterogeneous cell samples that cannot  
200 be readily dissociated into single cell suspensions (e.g. due to long cellular projections), or

201 when profiling archived samples not robust to freeze-thaw conditions. As such, single-nuclei  
202 sequencing is emerging as a method of choice for study of archived human brain tissue<sup>3,14,21,22</sup>.  
203 With such future applications in mind, we evaluated the ability of the Nadia platform to profile  
204 single nuclei suspensions of mouse 3T3 cells and human HEK293 cells, or mouse 3T3 cells  
205 alone. As with whole cell suspensions, mixed-species plots revealed a low doublet rate  
206 (**Supplementary figure 2**). In agreement with previous single nuclei sequencing studies<sup>14,23</sup>,  
207 a higher level of intronic reads were reported relative to whole cells (**Supplementary figure**  
208 **3**). Meanwhile, we found the Nadia platform had nuclear RNA capture rates that compared  
209 favourably to limited publically available single nuclei RNA-seq data and approached whole-  
210 cell datasets (**Figure 2E-F**)<sup>14</sup>. Whilst capture was marginally reduced relative to whole-cell  
211 profiling, the ability to fine-tune droplet dimensions with the Innovate has potential to improve  
212 nuclear RNA capture in future (e.g. <sup>14</sup>). Indeed, we observed an increase in cDNA generated  
213 when droplets were reduced from ~85  $\mu\text{m}$  to ~60  $\mu\text{m}$  (**Figure 1H**).

214

215 Taken together these experiments demonstrate the reliability of the Nadia platform in  
216 delivering expected theoretical performance, and the efficiency of the system for both single  
217 cell and single nuclei capture.

218

219 **Elucidating transcriptional regulatory networks of the cell cycle:** To demonstrate the  
220 ability of the Nadia platform to distinguish closely related cell populations, we evaluated gene  
221 expression profiles linked to cell-cycle progression in 233 human and 277 mouse cells from  
222 our “Nadia 12k” mixed-species experiment. Similar to a previous Drop-seq study<sup>9</sup>, and despite  
223 the dataset being generated from two asynchronous cell populations, in both species we were  
224 able to use gene expression profiles to infer five phases of the cell cycle that matched previous  
225 stages of chemically synchronized cells (**Figure 3A**)<sup>24</sup>. This phase assignment was supported  
226 by the cycling expression of certain established and novel cell cycle-associated genes, but not  
227 housekeeper genes (**Supplementary figure 4**).

228

229 Analysis of single cell gene expression profiles at different stages has previously been used  
230 to identify novel genes correlated to cell cycle phases<sup>9</sup>, but the identity of the master regulators  
231 that drive coordinated cell-cycle gene-expression programmes remains incompletely  
232 understood. Accordingly, we took an alternative approach and questioned whether  
233 summarised expression of transcription factor target networks, herein referred to as regulons,  
234 could be leveraged to infer the transcriptional regulators active in specific cell cycle phases.  
235 Indeed, low depths of sequencing and the absence of mRNA capture for many genes in  
236 individual cells (dropouts) can make single cell datasets ineffective in precisely quantitating  
237 the expression of individual genes. Meanwhile, many transcription factors can be regulated

238 post-transcriptionally such that their mRNA abundance is not a reliable proxy for protein  
239 activity. In contrast, regulon enrichments evaluate differential expression of many  
240 transcriptional targets such that these biological and measurement sources of noise are  
241 effectively averaged out.

242

243 To apply this strategy to the cell cycle we first turned to the manually curated TRRUST  
244 database of human and mouse regulons that have been determined from sentence-based text  
245 mining<sup>25</sup>. After filtering 800 human and 828 mouse regulons to those expressed in our datasets  
246 together with >10 targets, summarised expression profiles were generated for regulons of 77  
247 human and 78 mouse transcription factors across the human and mouse single cells. This  
248 revealed select transcriptional regulators whose activity correlated with distinct cell cycle  
249 phase scores in both species ( $p < 0.01$ , **Figure 3B-C**). Crucially, phase-specific activity aligned  
250 with previous studies of these regulators and the cell cycle; KLF5 accelerates mitotic entry  
251 and promotes cell proliferation by accelerating G2/M progression<sup>26</sup>, BRCA1 regulates key  
252 effectors controlling the G2/M checkpoint<sup>27</sup>, PTTG is active in G2/M phase<sup>28</sup>, MYCN stimulates  
253 cell cycle progression by reducing G1 phase<sup>29</sup>, Nr5a2/Lrh-1 knockdown leads to G1 arrest<sup>30,31</sup>,  
254 Myc is a potent inductor of the transition from G1 to S-phase<sup>32</sup>, and Sox2 is a mitotic  
255 bookmarking transcription factor active at the M/G1 phase<sup>33</sup>. Notably, E2F1 was found active  
256 in G2/M phase of human HEK293 cells and at S-phase of mouse 3T3 cells. This is consistent  
257 with its' control of both G1/S- and G2/M-regulated genes<sup>34</sup>, and E2F1's role in S-phase  
258 progression in mouse 3T3 cells<sup>35</sup>.

259

260 Whilst TRRUST reports high confidence and experimentally validated regulons,  
261 representation of most transcription factors is limited to few targets. As an alternative, and to  
262 further characterise the transcriptional responses of each phase of the human cells in this  
263 study, we reasoned regulons inferred by data-driven reverse-engineering methods may offer  
264 enhanced opportunity for discovering cell cycle master regulators. Here, VIPER (Virtual  
265 Inference of Protein-activity by Enriched Regulon analysis) has recently been developed for  
266 the accurate assessment of protein activity from regulon activity<sup>36</sup>, and has recently been  
267 extended to single cell analysis via the metaVIPER adaptation<sup>37</sup>. In the absence of previous  
268 regulons assembled from HEK293 gene expression profiles, we accordingly evaluated  
269 expression of regulons assembled from 24 TCGA human cancer tissue sets using  
270 metaVIPER. Indeed, the metaVIPER workflow previously established the utility and integrity  
271 of leveraging multiple non-tissue-matched regulons<sup>37</sup>. Encouragingly, this analysis extended  
272 our previous findings to reveal a further 78 transcription factors that correlated with one or  
273 more phases of cell cycle ( $p < 0.01$ , **Figure 3D-E, Supplementary Figure 5**).

274



275 Many of the identified transcription factors have previously been identified as master  
276 regulators of cell cycle. Among others this included ATF1, SATB2, FOXM1 and MYBL1/B-  
277 MYB. Several candidates displayed differential activity in the absence of clear phased-  
278 correlated changes in gene expression, thus suggesting activity is regulated by post-  
279 translational protein modifications or regulated protein clearance (**Figure 3E, Supplementary**  
280 **Figure 5**). Indeed, only 9/78 were determined as phase-specific genes in previous studies<sup>9,24</sup>,  
281 thus demonstrating the merit of our alternative analysis strategy. Differentially active regulators  
282 in the absence of phased gene expression changes included YY1 which is subject to  
283 regulatory phosphorylation by various cell cycle associated kinases including Aurora A<sup>38</sup> and  
284 PLK1<sup>39</sup>, FOXM1 that is regulated by SUMOylation<sup>40</sup> and PLK1 phosphorylation<sup>19</sup>, and REST  
285 which is regulated by phosphorylation and USP15 limited polyubiquitination<sup>41</sup>. However,  
286 certain transcription factors such as PITX1, SATB2, NR2F2, FOXO3 and MYBL1/B-MYB were  
287 regulated at the level of gene expression, likely due to coordinated upstream activity of other  
288 master regulators in the cell cycle regulatory gene network.

289

290 Last, in addition to known cell-cycle regulated master regulators, we importantly identified  
291 multiple differentially active transcription factors that had little or no known link to the cell cycle.  
292 This included RFXANK, DRAP1 and HES4 which were correlated with G1/S phase, ZNF33A,  
293 VEZF1, ZKSCAN1 which correlated with G2/M phase, and ZNF146, CEBPZ and KLF3 that  
294 were maximally correlated with mitosis (**Supplementary Table**). Unlike the others, RFXANK,  
295 DRAP1, ZKSCAN1, CEBPZ and KLF3 had no clear relationship between cycling expression  
296 levels and activity (**Figure 3E, Supplementary Figure 5**). Accordingly, it will now be important  
297 to determine how the phased-activity of these novel cell cycle associated transcription factors  
298 manifests in the absence of regulation at the level of gene expression. Indeed, the recent  
299 findings that levels of ZKSCAN1 modulate hepatocellular carcinoma progression *in vivo* and  
300 *in vitro*<sup>42</sup>, HES4 expression is linked to osteosarcoma prognosis<sup>43</sup>, and that KLF3 loss  
301 correlates with aggressive colorectal cancer phenotypes<sup>44</sup> suggests such understanding could  
302 have translational potential. Taken together, our regulon analysis thus confirms, and in several  
303 cases extends, understanding of the phase-correlated activity of many transcription factors  
304 across cell cycle.

305

306

## 307 **Discussion:**

308

309 Droplet-based single cell transcriptomics is a more scalable and cost-effective strategy than  
310 individual well<sup>45</sup>, FACS<sup>46,47</sup> or fluidic circuit-based<sup>48</sup> alternatives. Here we present a new  
311 pressure-controlled and user-friendly microfluidics system that can rapidly enable this

312 powerful strategy to even the inexperienced user. Using pre-fabricated and disposable  
313 microfluidics cartridges, the Nadia guides the experimenter through a simple-to-follow  
314 workflow that encapsulates ~8,000 cells per sample, and up to 8 samples in parallel all in  
315 under 20 minutes. The paired Innovate add-on provides further opportunity to customise all  
316 experimental parameters according to the research question requirements. We present  
317 evidence of this experimental adaptability, and report high quality sequencing metrics that  
318 compare favourably in the field. We finally demonstrate potential utility of the platform by  
319 integrating single-cell transcriptomics with systems biology workflows to extend mechanistic  
320 characterisation of the cell cycle. Notably, and among others, we identified DRAP1, ZKSCAN1  
321 and CEPBZ as novel transcription factors with phased-specific activity across G1/S, G2/M and  
322 mitosis, respectively.

323

324 Flexibility provided by both the Nadia Instrument and the Nadia Innovate is unrivalled by other  
325 single-cell microfluidics platforms for droplet based sequencing. Indeed, all parameters of the  
326 microfluidics capture process can be modified, including droplet size, stir speeds, incubation  
327 temperatures, buffer types and bead composition. The scalability that is achievable through  
328 the multiplexed and parallel processing of up to 8 samples can further match or exceed that  
329 of other comparable platforms<sup>10,16</sup>. We demonstrate a high integrity and quality of the  
330 transcriptome profiles generated when using the Nadia. Indeed, with standard settings we  
331 report a low doublet rate between 1-7% (Fig 2A, Supplementary Figure 2), and favorable RNA  
332 capture efficiencies for both single cell and single nuclei sequencing compared to other reports  
333 and commercial platforms<sup>9,14,16</sup>. Last, the ease-of-use and speed of microfluidics capture will  
334 ensure experiment start-to-finish times are kept to a minimum. Accordingly, unintended  
335 sample lysis and RNA degradation due to extended protocols is mitigated.

336

337 We used the Nadia platform and droplet sequencing workflow to profile the transcriptomes of  
338 asynchronous human and mouse cells that subsequently allowed us to infer the different  
339 phases of the cell cycle. Notably, the high complexity cDNA libraries allowed us to characterise  
340 the cells by transcription factor activity using recently developed systems biology approaches.  
341 Our analysis uncovered 83 human transcription factors with inferred activity correlated with  
342 one or more cell cycle phase. Despite this, and as noted previously<sup>37</sup>, the employed  
343 metaVIPER approach cannot accurately measure activity of proteins whose regulons are not  
344 represented adequately in one of the interactomes used for regulon inference. Accordingly,  
345 this may explain the absence of overlap between TRRUST curated regulons and those derived  
346 from 24 TCGA human cancer tissue sets. However, the expected phase-specific activity of  
347 multiple transcription factors (e.g. KLF5, BRCA1, Sox2, Nr5a2, ATF1, SATB2, FOXM1 and  
348 MYBL1/B-MYB) when using each source of regulons provides strong support for the validity

349 of the workflow using both sets. The limitation may be mitigated in future as more cell-type  
350 specific interactomes are produced.

351

352 In addition to confirming phased-activity of many transcription factors such as ATF1, SATB2,  
353 FOXM1 and MYBL1/B-MYB, our analysis uncovered several others not previously connected  
354 to the cell cycle. This included RFXANK, DRAP1 and HES4 which were correlated with G1/S  
355 phase, ZNF33A, VEZF1, ZKSCAN1 which correlated with G2/M phase, and ZNF146, CEBPZ  
356 and KLF3. Accordingly, our analysis exemplifies how single-cell transcriptome profiling can be  
357 used to further the mechanistic understanding of basic cellular biology. There remains a  
358 paucity of knowledge about each of these factors (**Supplementary Table**). It will now be  
359 important to experimentally dissect the roles and importance of these novel factors to  
360 proliferating cells, how their activity is precisely controlled across phases, and determine their  
361 roles in disease. Indeed, the aforementioned links between ZKSCAN1 levels and  
362 hepatocellular carcinoma<sup>42</sup>, HES4 levels and osteosarcoma<sup>43</sup>, and KLF3 levels with colorectal  
363 cancer<sup>44</sup> suggests enhanced understanding of these factors in the context of the cell cycle  
364 could have translational potential.

365

366 In summary then, and as evidenced by our analysis of the cell cycle, the Nadia platforms's  
367 high quality output coupled with its' flexibility across different buffers, workflows and user-  
368 determined parameters suggest it will be an attractive technology for future transcriptomic  
369 studies at cell resolution.

370 **Acknowledgements:** This work was supported by an Edmond Lily Safra fellowship and a Sir  
371 Henry Dale fellowship jointly funded by the Wellcome Trust and the Royal Society (grant no.  
372 215454/Z/19/Z) to CRS, and funding to CRS from the National Institute for Health Research  
373 (NIHR) Biomedical Research Centre based at Imperial College Healthcare NHS Trust and  
374 Imperial College London. The views expressed are those of the authors and not necessarily  
375 those of the NHS, the NIHR or the Department of Health. All sequencing was performed by  
376 the Imperial BRC genomics facility.

377

378 **Author contributions:** DW, HF and CRS designed experiments. KD and DW performed  
379 experiments with contributions from EK, FK and CRS. CRS analysed the data. CRS wrote the  
380 manuscript.

381

382 **Declaration of interests:** DW, FK and HF are employees for Dolomite Bio.

383 **Methods:**

384

385 *Cell preparation:* HEK293, HeLa and 3T3 cells were cultured in DMEM with 10% fetal bovine  
386 serum (Life Technologies) and 1× penicillin-streptomycin (Life Technologies). Cells were  
387 trypsinised for 5 minutes with TrypLE (Life Technologies) before being collected and spun  
388 down for 5 min at 300 g. The pellet was resuspended in 1 ml of PBS-BSA (1x PBS, 0.01%  
389 BSA) and spun again for 3 min at 300 g. The cells were resuspended in 1 ml of PBS, passed  
390 through a 40 µm cell strainer and counted. A concentration of 300 cells/µl in 250 µl of PBS-  
391 BSA was subsequently used to allow for the encapsulation of ~1 cell in every 20 droplets.

392

393 *Nuclei suspension preparation:* In brief, nuclei isolation media (NIM) was prepared in advance  
394 (250mM sucrose, 25 mM KCl, 5 mM MgCl<sub>2</sub>, 10 mM Tris pH8) and pre-chilled. Cells were  
395 trypsinised for 5 minutes with TrypLE (Life Technologies) before being collected and spun  
396 down for 5 min at 300 g. The pellet was resuspended in 1 ml of PBS-BSA (1x PBS, 0.01%  
397 BSA, 0.02 U/µl supernasin) and spun again for 3 min at 300 g. The cells were resuspended in  
398 1 ml of nuclei homogenisation buffer (NIM, 1 µM DTT, 1x Protease inhibitor, 0.1% Triton X-  
399 100, 0.04 U/µl RNasin, 0.02 U/µl Superasin) and mixed by gentle pipetting. Sample was then  
400 spun at 300g and 4°C for 5 minutes. Supernatant was discarded and the pellet was  
401 resuspended in 1 ml of PBS-BSA (0.01% BSA, 0.02 U/µl supernasin). Finally, sample was  
402 vortexed and filtered through a 40 µm strainer before nuclei quality was assessed with trypan  
403 blue and Hoechst staining and diluted to desired concentration for Nadia loading.

404

405 *Microfluidics capture:* Cell or nuclei suspensions were captured using the Nadia system  
406 according to pre-programmed instrument protocols for drop-seq or sNuc-seq that were  
407 accessed through the instruments touch-screen interface. In brief, the Nadia is a fully-  
408 automated, bench-top and microfluidic droplet-based platform that can encapsulate up to 8  
409 separate samples in parallel. Each experiment used disposable microfluidic cartridges  
410 (covering 1, 2, 4 or 8 samples) with no wetted parts to avoid cross contamination. For each  
411 sample, 250 µl of 40 µM-filtered barcoded bead (Chemgene, USA) suspension was loaded  
412 into one of the cartridge's chambers, 250 µl of sample into the second, and 3 ml of oil loaded  
413 into the third. Where deformable beads were used, beads were non-barcoded gel beads.  
414 Unless specified, cartridge integrated stir bars were set at 75 rpm (cells), 35 rpm (nuclei) and  
415 200 rpm (beads) to ensure that the samples and beads remained in suspension throughout  
416 microfluidics capture. Each pre-programmed run lasted 16 minutes and involved bead, sample  
417 and oil channels being merged to form oil droplets that co-encapsulated beads together with  
418 single cells/nuclei. During each run, three independent pressure pumps controlled the oil,  
419 sample and bead channels at pressures up to 1 bar. This ensured consistent conditions and

420 droplet dimensions during each run, whilst providing greatest flexibility to manipulate droplet  
421 size and frequency. The standard pressures used were; beads 140 mBar, samples 130 mBar,  
422 oil 450 mBar. Double Poisson loading constraints determine that ~8000 cells/nuclei from a  
423 single sample are co-encapsulated with beads when using these default run parameters.  
424 Accordingly, 8 samples run in parallel can capture ~56,000 cells/nuclei during a single run.  
425 Additional manipulations of pressure to alter droplet sizes were controlled by the connected  
426 Innovate system; an open configurable system used to develop new protocols and  
427 applications. Corresponding pressure values are indicated in the text where relevant. Of note,  
428 the innovate was connected to a high-speed microscope and camera for real-time droplet  
429 formation at the microfluidics junction. Following sample capture in each run, the Nadia's  
430 integrated cooling device was used to chill the samples at 4°C before commencement of library  
431 preparation.

432

433 *Library preparation:* cDNA libraries for 3' mRNA profiling were prepared using the previously  
434 described protocol of Macosko et al. with minor modifications<sup>9</sup>. In summary, mRNA bound  
435 beads were removed from the Nadia Instrument's collection chamber and transferred to a 50  
436 ml falcon tube. Next, 30 mls of 6x SSC buffer (Life Technologies) and 1ml of 1H,1H,2H,2H-  
437 Perfluorooctan-1-ol (Sigma Aldrich) were added before mixing via inversion. After spinning at  
438 1000g for 2 minutes the supernatant was removed and retained in a separate falcon whilst  
439 being careful not to disturb the beads at the oil-water interface. A further 30 mls of 6x SSC  
440 buffer were added to the original sample to disturb the beads before mixing via inversion. Oil  
441 was allowed to settle to the bottom before bead containing suspension was transferred to a  
442 new falcon tube. After disturbing the oil fraction with a 1 ml pipette to collect any missed beads,  
443 both falcons containing ~30 mls of bead containing SSC buffer were spun at 1000g and 4°C  
444 for 2 minutes. At this stage, ~26mls of supernatant was carefully removed from each tube  
445 whilst being careful not to disturb the beads. Beads were subsequently resuspended with  
446 retained buffer and transferred to a 1.5 ml eppendorf. Beads were spun down in a desktop  
447 micro-centrifuge and buffer removed. Additional bead fractions were added and the process  
448 repeated until all beads were collected. At this stage the buffer was removed and all beads  
449 washed by pipetting in 1 ml of 6x SSC buffer. Buffer was removed and beads were  
450 subsequently washed in 200 µl of 5x Maxima RT buffer (Life Technologies).

451

452 Reverse transcription was performed in 200 µl of a 1x RT mix (80 µl nuclease free water, 40  
453 µl of 5x Maxima RT buffer, 40 µl of 20% Ficoll PM-400, 20 µl of 10 mM dNTP mix, 5 µl of  
454 RNasin, 10 µl of Maxima H-RT enzyme, 5 µl of 100 µM TSO-RT primer) with the following  
455 conditions; 30 minutes at 23°C, 2 hours at 42°C. Throughout the process the sample was set  
456 to shake at 1100 rpm. Beads were subsequently spun down, RT mix removed and the beads

457 washed in once in TE-SDS buffer (10 mM Tris pH 8, 1 mM EDTA, 0.5% SDS), twice in TE-  
458 TW buffer (10 mM Tris pH 8, 1 mM EDTA, 0.01% Tween-20) and once in 300 µl of 10 mM Tris  
459 pH 8. Beads were subsequently incubated for 45 minutes at 37°C and 1100 rpm in  
460 Exonuclease I mix (170 µl nuclease free water, 20 µl 10x Exonuclease I buffer, 10 µl  
461 Exonuclease I - Life Technologies). Beads were then washed once in TE-SDS buffer, twice in  
462 TE-TW buffer and then re-suspended in 300 µl of nuclease free water. Beads were  
463 subsequently counted with a haemocytometer after mixing 20 µl of beads with 20 µl of 20%  
464 PEG400 (Sigma Aldrich). An average of 4 counts were taken before test PCRs at different  
465 cycle numbers were performed with desired bead aliquots for each experiment (~2000-5000)  
466 to gauge optimal cycles for final PCRs on subsequent beads. Specifically, PCR mix included  
467 24.6 µl of nuclease free water, 0.4 µl of 100 µM TSO-PCR primer, and 25 µl of Kapa HiFi  
468 readymix (Roche Diagnostics). Cycling conditions were 95°C for 3 minutes, four cycles of 98°C  
469 for 20 seconds, 65°C for 45 seconds, 72°C for 3 minutes, followed by variable cycles (~9-14)  
470 of 98°C for 20 seconds, 67°C for 20 seconds, 72°C for 3 minutes. A final extension of 72°C for  
471 3 minutes completed the PCR. At the end of elongation steps during the first four cycles, PCR  
472 tubes were removed from machine and beads suspended by gentle agitation.

473  
474 Following optimised PCRs of desired bead numbers, we enriched cDNA products longer than  
475 300 base pairs using select-a-size spin columns (Zymogen) according to the manufacturer  
476 protocol. After bioanalyser evaluation and quantification of products, 550 pg of DNA was used  
477 as input for an Illumina Nextera tagmentation reaction according to manufacturer's protocol  
478 (15 µl Nextera PCR mastermix, 8 µl nuclease free water, 1 µl of 10 µM TSO-hybrid oligo, 1 µl  
479 of 10 µM Nextera N70X indexed oligo). This reaction reduced cDNA libraries to a size  
480 distribution suitable for Illumina sequencing, and added a common PCR handle for 12 cycles  
481 of final library amplification (95°C for 30 seconds, twelve cycles of 95°C for 10 seconds, 55°C  
482 for 30 seconds, 72°C for 30 seconds, final extension of 72°C for 3 minutes). Last, as shorter  
483 cDNA inserts are more likely to be overlap variable length poly-A tails, we again enriched for  
484 cDNA products longer than 300 base pairs using select-a-size spin columns (Zymogen)  
485 according to the manufacturer protocol. The final library profiles were then evaluated and  
486 quantified with a Bioanalyser, Qubit and TapeStation prior to sequencing.

487  
488 *Next generation sequencing:* All high throughput sequencing was performed using an Illumina  
489 NextSeq 500 sequencer at the Imperial BRC genomics facility. Samples were run using a  
490 custom read 1 primer (Read1customSeq). Read 1 was set at >20 base pairs to read through  
491 the cellular and molecular barcodes, and read 2 set at >25 base pairs to read cDNA inserts.  
492 Additional 8 base pair index reads were used to determine libraries within multiplexed runs.

493 Each run had 5-10% PhiX spiked in to the library to ensure suitable complexity at low diversity  
494 sequencing cycles.

495

496 *Oligonucleotides:* The following oligonucleotides were used for library preparation and  
497 sequencing:

498

499 TSO-RT: AAGCAGTGGTATCAACGCAGAGTGAATrGrGrG

500 TSO-PCR: AAGCAGTGGTATCAACGCAGAGT

501 TSO-hybrid: AATGATACGGCGACCACCGAGATCTACACGCCTGTCCGCGGAAGCAGTGGTATCAACGCAGAGT\*A\*C

502 Nextera N70X: CAAGCAGAAGACGGCATAACGAGAT [XXXXXXXX] GTCTCGTGGGCTCGG

503 Read1customSeq: GCCTGTCCGCGGAAGCAGTGGTATCAACGCAGAGTAC

504

505 *Data processing:* Raw fastq files were processed with the Drop-seq toolkit established in  
506 Macosko et al.<sup>9</sup> according to recommended guidelines. The pipeline was implemented via the  
507 DropSeqPipe v0.4 workflow<sup>49</sup>. In brief, Cutadapt v1.16 was used for adapter trimming, with  
508 trimming and filtering was performed on both fastq files separately. STAR v2.5.3 was used for  
509 mapping to annotation release v.94 and genome build v.38 for *Mus musculus*, or annotation  
510 release v.91 and genome build v.38 for *Homo sapiens*. Multimapped reads were discarded.  
511 Dropseq\_tools v2 was used for demultiplexing and file manipulation according to  
512 recommended guidelines, and technology-specific positions of the cell barcodes and unique  
513 molecular identifiers (UMI) were used. A whitelist of cells barcodes with minimum distance of  
514 3 bases was used. Cell barcodes and UMI with a hamming distance of 1 and 2 respectively  
515 were corrected.

516

517 For cell cycle phase determination, gene expression profiles of individual cells were related to  
518 adapted gene sets used in Macosko et al. that represent distinct phases of the cell cycle<sup>9</sup>.  
519 Specifically, phase scores for each cell-cycle stage were determined for individual cells by  
520 averaging the log normalised expression levels, derived using Seurat (v3.1.1)<sup>50</sup>, of the genes  
521 in each gene-set. The mean scores for each phase were then mean centred and standard  
522 deviation normalised across all cells, before phases for each individual cell were mean centred  
523 and standard deviation normalised. Cells were subsequently ordered according to the  
524 combination of phases determined to be switched on in each individual cell.

525

526 *Regulatory transcriptional networks:* Datasets were initially filtered to those genes expressed  
527 in at least 10% of cells of each single-cell library. Raw counts were subsequently log  
528 normalised and scaled with Seurat. For figures 3B and 3C, human and mouse transcription  
529 factor targets were downloaded from the TRRUST v2 database<sup>25</sup>. Regulons were  
530 subsequently filtered to those expressed in respective human and mouse cell datasets



531 alongside >10 identified targets. Transcription factor activity was subsequently scored in  
532 individual cells by averaging the normalised expression levels of the genes in each regulon.  
533 The mean scores for each regulon were mean centred and standard deviation normalised  
534 across all cells. Normalised inferred regulon activity of individual cells was subsequently  
535 correlated with the previously inferred phase-specific scores, with those having a significant  
536 ( $p < 0.01$ ) pearson correlation of >0.3 with one or more phases being used for presentation.  
537 The cor.test function of the stats (v. 3.6.1) R package was used for calculation of pearson  
538 correlation and test statistics. For figures 3D and 3E, regulons used were previously derived  
539 from 24 TCGA human cancer RNA-seq datasets and accessed from the 'aracne.networks' R  
540 package. VIPER (v.1.18.1)<sup>36,37</sup> was used to score all regulons from the 24 TCGA human  
541 cancers in all individual human HEK293 cells, before the average of all normalised enrichment  
542 scores (i.e. avgScore) for each specific master regulator was used to integrate scores into a  
543 single metric. The mean scores for each regulon were mean centred and standard deviation  
544 normalised across all cells. Inferred regulon activity of individual cells was subsequently  
545 correlated with the previously inferred phase-specific scores, with those having a pearson  
546 correlation of >0.35 with one or more phases being used for presentation.

547

548 *Data availability:* Study generated transcriptomic data has been deposited in the GEO  
549 repository and will be made available upon publication. External datasets were collected from  
550 following sources: Macasko et al. 2015 mixed species from GEO accession GSE63473  
551 (SRR1748412), Chromium v3 from 10x Genomics (<https://www.10xgenomics.com>), Habib et  
552 al. 2017 mouse 3T3 nuclei from the Broad Institutes Single Cell portal  
553 ([https://portals.broadinstitute.org/single\\_cell](https://portals.broadinstitute.org/single_cell)).

554 **Figure Legends:**

555

556 **Figure 1: An open platform for single cell transcriptome profiling. A)** The Nadia  
557 Instrument (right) and Nadia Innovate (left) benchtop platform for single-cell transcriptomics.

558 **B)** Design of the disposable microfluidics cartridge used in the Nadia. **C)** Schematic of the  
559 droplet sequencing workflow used in the Nadia platform. In brief, single cells or nuclei are  
560 encapsulated in oil droplets together with barcoded beads. Following lysis within droplets the  
561 released mRNA is captured upon the bead and provided both a cell barcode and a unique  
562 molecular identifier. Beads are subsequently pooled prior to reverse-transcription and  
563 generation of cDNA libraries called “single-cell transcriptomes attached to microparticles”  
564 (STAMPs). The barcoded STAMPs are then amplified in pools for high-throughput RNA-seq.

565 **D)** Theoretical variation of droplet size by changing oil and liquid stream pressures. **E)**  
566 Experimental variation of droplet size by changing oil and liquid stream pressures. White scale  
567 bars represent 100  $\mu\text{m}$ . **F)** Stable droplet diameters at different oil pressures. Inset shows  
568 example droplets containing non-deformable beads. **G)** Bioanalyser traces of full-length  
569 transcript PCRs amplified from identical bead numbers but different droplet dimensions. **H)**  
570 Example image of deformable beads captured with the Nadia system. Upper left panel shows  
571 crowding of deformable beads behind microfluidics junction, lower left panel shows droplet  
572 occupancy following synchronised deformable bead loading. For reader guidance, outlines of  
573 three deformable beads are indicated with dashed lines, and droplets containing beads are  
574 marked by black arrowheads. Right panel shows zoomed out image revealing >70% droplet  
575 occupancy of deformable beads. For reader guidance, all droplets containing a deformable  
576 bead are marked by a black asterik.

577

578 **Figure 2: Technical performance for single cell and single nuclei sequencing. A)** Mixed  
579 species barnyard plot of transcripts after profiling 2,000 collected beads (i.e. 100 expected  
580 STAMPs) representing a mix of human HEK293 cells and mouse 3T3 cells input at platform  
581 recommended cell loading density of  $3 \times 10^5$  cells per ml. **B)** Cumulative frequency plots  
582 reporting sequencing reads associated with individual barcodes when using indicated starting  
583 bead inputs for cDNA library construction. Dashed red lines indicate expected STAMPs for  
584 each experiment. Larger panel represents dataset used in panel A. “Nadia 2k” generated  
585 cDNA libraries from 2,000 beads, “Nadia 0.5k” from 500 beads, and “Nadia 12k” from 12,000  
586 beads. **C)** Number of UMIs detected relative to individual STAMP read counts for indicated  
587 mixed-species whole cell experiments (see methods). “Nadia 2k” profiled 2000 collected  
588 beads and expected 100 STAMPs, “Nadia 12k” profiled 12000 beads and expected 600  
589 STAMPs, “Macosko et al. 2015” expected 100 STAMPs, “Chromium v3” expected 1400  
590 STAMPs. Dashed line represents maximal point at which each sequencing read would report

591 a unique UMI. **D)** Same as C but with detected genes reported rather than UMIs. **E)** Number  
592 of UMIs detected relative to individual STAMP read counts for indicated mouse 3T3  
593 experiments (see methods). Dashed line represents maximal point at which each sequencing  
594 read would report a unique UMI. **F)** Same as E but with detected genes reported rather than  
595 UMIs.

596

597

598 **Figure 3: Elucidating transcriptional regulatory networks of the cell cycle. A)** Inferred  
599 cell cycle states of 233 human HEK293 cells (left panel) and 277 mouse 3T3 cells (right panel)  
600 based on the gene expression profiles of individual cells relative to stage-specific gene sets  
601 (see methods). Cells are ordered by the combination of phases switched on in each individual  
602 cell. **B)** Inferred activity of indicated transcription factors based on TRRUST defined regulon  
603 expression in individual human HEK293 cells. Dashed lines highlight cell cycle phase  
604 assignments used to determine correlation to transcription factor activity. Normalised scores  
605 for each transcription factor have been mean centred across all cells. **C)** Same as B but for  
606 mouse transcription factors and individual mouse 3T3 cells. **D)** Inferred activity of indicated  
607 transcription factors in individual human HEK293 cells based on the summarised expression  
608 of regulons that had been inferred from 24 TCGA human cancer tissue sets. Dashed lines  
609 highlight cell cycle phase assignments used to determine correlation to transcription factor  
610 activity. Normalised scores for each transcription factor have been mean centred across all  
611 cells. **E)** Boxplots showing normalised inferred activity and normalised gene expression across  
612 different phases for selective transcription factors shown in D. Normalised activity and  
613 expression scores for each transcription factor were mean centred across all cells before being  
614 summarised by assigned cell cycle phase.

615 **Supplementary figure legends:**

616

617 **Supplementary figure 1: A)** Nadia cartridge in both 1 and 8 individual microfluidic chip  
618 formats. **B)** Nadia generated oil droplets using a cell/nuclei lysis buffer containing 0.2%  
619 sarkosyl and 6 % of the Ficoll PM-400 sucrose-polymer. Brightfield shows mono-dispersed  
620 droplets and encapsulation of non-deformable beads. Hoechst staining reveals additional  
621 droplets where whole cells have been encapsulated and lysed (white arrows). **C)** Nadia  
622 generated oil droplets using a cytoplasmic lysis buffer containing 0.5% Igepal CA-630.  
623 Brightfield shows mono-dispersed droplets and encapsulation of non-deformable beads.  
624 Hoechst staining reveals additional droplets where whole cells have been encapsulated and  
625 the unlysed nuclei are stained (white arrows). **D)** Replacement of lysis buffer with hydrogel  
626 liquid precursors (e.g. 1% agarose) allows whole cell microencapsulation. Left panel:  
627 Brightfield and imaging of Hoechst-stained HEK293 cells reveals that individual cells were  
628 successfully encapsulated at a distribution of ~1 cell per 5 droplets. White arrowheads indicate  
629 encapsulated cells. Right panel: Brightfield and imaging Hoechst-stained HEK cells reveals  
630 agarose beads containing HEK293 cells were successfully extracted from the emulsion using  
631 perfluorooctanol. White arrowheads indicate encapsulated cells. All agarose beads have been  
632 outlined in hashed white lines to aid visualisation. **E)** Same as D except mixed cell populations  
633 have been co-encapsulated, and only released agarose beads are shown. Human HEK293  
634 cells are Hoechst stained (middle panel), mouse 3T3 cells have been stained with calcein  
635 (lower panel). White arrowheads indicate encapsulated cells. All agarose beads have been  
636 outlined in hashed white lines to aid visualisation.

637

638 **Supplementary figure 2: A)** Mixed species barnyard plot of transcripts after profiling 16,000  
639 collected beads representing a mix of human HeLa cells and mouse 3T3 cells input at platform  
640 recommended cell loading density of  $3 \times 10^5$  cells per ml. **B)** Mixed species barnyard plot of  
641 transcripts after profiling 12,000 collected beads representing a mix of human HeLa cells and  
642 mouse 3T3 cells input at cell loading density of  $5 \times 10^5$  cells per ml. **C)** Mixed species barnyard  
643 plot of transcripts after profiling a mix of human HEK293 cells and mouse 3T3 nuclei at  
644 platform recommended loading densities. STAMPS with less than 1,000 UMIs were filtered  
645 out.

646

647 **Supplementary figure 3: A)** Percentages of reads mapped to the indicated regions of the  
648 human genome for human HEK293 cells (left panel), and percentages of reads mapped to the  
649 indicated regions of the mouse genome for mouse 3T3 cells (right panel). Cells detailed are  
650 those profiled in Figure 2A. **B)** Percentages of reads mapped to the indicated regions of the  
651 human genome for human HEK293 nuclei (left panel), and percentages of reads mapped to

652 the indicated regions of the mouse genome for mouse 3T3 nuclei (right panel). Cells detailed  
653 are those profiled in Supplementary Figure 2C. **C)** Percentages of reads mapped to the  
654 indicated regions of the mouse genome for mouse 3T3 nuclei. Cells detailed are those profiled  
655 in Figure 2E-F.

656

657 **Supplementary figure 4:** Normalised gene expression profiles of indicated genes across the  
658 cell cycle. Shown are classical cell cycle associated genes (top two rows), novel cell cycle  
659 associated genes discovered in Macasko et al. 2015 (third row), and housekeeper genes not  
660 expected to be correlated with distinct cell cycle phases (fourth row).

661

662 **Supplementary figure 5:** Boxplots showing normalised inferred activity and normalised gene  
663 expression across different phases for selective transcription factors shown in figure 3D.  
664 Normalised activity and expression scores for each transcription factor were mean centred  
665 across all cells before being summarised by assigned cell cycle phase.

666 **References:**

667

668 1 Montoro, D. T. *et al.* A revised airway epithelial hierarchy includes CFTR-expressing  
669 ionocytes. *Nature* **560**, 319-324, doi:10.1038/s41586-018-0393-7 (2018).

670 2 Keren-Shaul, H. *et al.* A Unique Microglia Type Associated with Restricting  
671 Development of Alzheimer's Disease. *Cell* **169**, 1276-1290 e1217,  
672 doi:10.1016/j.cell.2017.05.018 (2017).

673 3 Mathys, H. *et al.* Single-cell transcriptomic analysis of Alzheimer's disease. *Nature*  
674 **570**, 332-337, doi:10.1038/s41586-019-1195-2 (2019).

675 4 Cao, J. *et al.* Comprehensive single-cell transcriptional profiling of a multicellular  
676 organism. *Science* **357**, 661-667, doi:10.1126/science.aam8940 (2017).

677 5 Svensson, V., Vento-Tormo, R. & Teichmann, S. A. Exponential scaling of single-cell  
678 RNA-seq in the past decade. *Nat Protoc* **13**, 599-604, doi:10.1038/nprot.2017.149  
679 (2018).

680 6 Ramskold, D. *et al.* Full-length mRNA-Seq from single-cell levels of RNA and individual  
681 circulating tumor cells. *Nat Biotechnol* **30**, 777-782, doi:10.1038/nbt.2282 (2012).

682 7 Shalek, A. K. *et al.* Single-cell transcriptomics reveals bimodality in expression and  
683 splicing in immune cells. *Nature* **498**, 236-240, doi:10.1038/nature12172 (2013).

684 8 Huang, Y. & Sanguinetti, G. BRIE: transcriptome-wide splicing quantification in single  
685 cells. *Genome Biol* **18**, 123, doi:10.1186/s13059-017-1248-5 (2017).

686 9 Macosko, E. Z. *et al.* Highly Parallel Genome-wide Expression Profiling of Individual  
687 Cells Using Nanoliter Droplets. *Cell* **161**, 1202-1214, doi:10.1016/j.cell.2015.05.002  
688 (2015).

689 10 Klein, A. M. *et al.* Droplet barcoding for single-cell transcriptomics applied to embryonic  
690 stem cells. *Cell* **161**, 1187-1201, doi:10.1016/j.cell.2015.04.044 (2015).

691 11 Rosenberg, A. B. *et al.* Single-cell profiling of the developing mouse brain and spinal  
692 cord with split-pool barcoding. *Science* **360**, 176-182, doi:10.1126/science.aam8999  
693 (2018).

694 12 Stoeckius, M. *et al.* Simultaneous epitope and transcriptome measurement in single  
695 cells. *Nat Methods* **14**, 865-868, doi:10.1038/nmeth.4380 (2017).

696 13 Peterson, V. M. *et al.* Multiplexed quantification of proteins and transcripts in single  
697 cells. *Nat Biotechnol* **35**, 936-939, doi:10.1038/nbt.3973 (2017).

698 14 Habib, N. *et al.* Massively parallel single-nucleus RNA-seq with DroNc-seq. *Nat*  
699 *Methods* **14**, 955-958, doi:10.1038/nmeth.4407 (2017).

700 15 Zhang, Q. *et al.* Development of a facile droplet-based single-cell isolation platform for  
701 cultivation and genomic analysis in microorganisms. *Sci Rep* **7**, 41192,  
702 doi:10.1038/srep41192 (2017).

- 703 16 Zheng, G. X. *et al.* Massively parallel digital transcriptional profiling of single cells. *Nat*  
704 *Commun* **8**, 14049, doi:10.1038/ncomms14049 (2017).
- 705 17 Khan, S. & Kaihara, K. A. Single-Cell RNA-Sequencing of Peripheral Blood  
706 Mononuclear Cells with ddSEQ. *Methods Mol Biol* **1979**, 155-176, doi:10.1007/978-1-  
707 4939-9240-9\_10 (2019).
- 708 18 Zilionis, R. *et al.* Single-cell barcoding and sequencing using droplet microfluidics. *Nat*  
709 *Protoc* **12**, 44-73, doi:10.1038/nprot.2016.154 (2017).
- 710 19 Fu, Z. *et al.* Plk1-dependent phosphorylation of FoxM1 regulates a transcriptional  
711 programme required for mitotic progression. *Nat Cell Biol* **10**, 1076-1082,  
712 doi:10.1038/ncb1767 (2008).
- 713 20 Caliani, S. R. & Burdick, J. A. A practical guide to hydrogels for cell culture. *Nat Methods*  
714 **13**, 405-414, doi:10.1038/nmeth.3839 (2016).
- 715 21 Lake, B. B. *et al.* Integrative single-cell analysis of transcriptional and epigenetic states  
716 in the human adult brain. *Nat Biotechnol* **36**, 70-80, doi:10.1038/nbt.4038 (2018).
- 717 22 Jakel, S. *et al.* Altered human oligodendrocyte heterogeneity in multiple sclerosis.  
718 *Nature* **566**, 543-547, doi:10.1038/s41586-019-0903-2 (2019).
- 719 23 Lake, B. B. *et al.* A comparative strategy for single-nucleus and single-cell  
720 transcriptomes confirms accuracy in predicted cell-type expression from nuclear RNA.  
721 *Sci Rep* **7**, 6031, doi:10.1038/s41598-017-04426-w (2017).
- 722 24 Whitfield, M. L. *et al.* Identification of genes periodically expressed in the human cell  
723 cycle and their expression in tumors. *Mol Biol Cell* **13**, 1977-2000, doi:10.1091/mbc.02-  
724 02-0030 (2002).
- 725 25 Han, H. *et al.* TRRUST v2: an expanded reference database of human and mouse  
726 transcriptional regulatory interactions. *Nucleic Acids Res* **46**, D380-D386,  
727 doi:10.1093/nar/gkx1013 (2018).
- 728 26 Nandan, M. O., Chanchevalap, S., Dalton, W. B. & Yang, V. W. Kruppel-like factor 5  
729 promotes mitosis by activating the cyclin B1/Cdc2 complex during oncogenic Ras-  
730 mediated transformation. *FEBS Lett* **579**, 4757-4762,  
731 doi:10.1016/j.febslet.2005.07.053 (2005).
- 732 27 Yarden, R. I., Pardo-Reoyo, S., Sgagias, M., Cowan, K. H. & Brody, L. C. BRCA1  
733 regulates the G2/M checkpoint by activating Chk1 kinase upon DNA damage. *Nat*  
734 *Genet* **30**, 285-289, doi:10.1038/ng837 (2002).
- 735 28 Su, X. *et al.* Inhibition of PTTG1 expression by microRNA suppresses proliferation and  
736 induces apoptosis of malignant glioma cells. *Oncol Lett* **12**, 3463-3471,  
737 doi:10.3892/ol.2016.5035 (2016).

- 738 29 Gherardi, S., Valli, E., Erriquez, D. & Perini, G. MYCN-mediated transcriptional  
739 repression in neuroblastoma: the other side of the coin. *Front Oncol* **3**, 42,  
740 doi:10.3389/fonc.2013.00042 (2013).
- 741 30 Bayrer, J. R., Mukkamala, S., Sablin, E. P., Webb, P. & Fletterick, R. J. Silencing LRH-  
742 1 in colon cancer cell lines impairs proliferation and alters gene expression programs.  
743 *Proc Natl Acad Sci U S A* **112**, 2467-2472, doi:10.1073/pnas.1500978112 (2015).
- 744 31 Jin, J. *et al.* Targeting LRH1 in hepatoblastoma cell lines causes decreased  
745 proliferation. *Oncol Rep* **41**, 143-153, doi:10.3892/or.2018.6793 (2019).
- 746 32 Garcia-Gutierrez, L., Delgado, M. D. & Leon, J. MYC Oncogene Contributions to  
747 Release of Cell Cycle Brakes. *Genes (Basel)* **10**, doi:10.3390/genes10030244 (2019).
- 748 33 Deluz, C. *et al.* A role for mitotic bookmarking of SOX2 in pluripotency and  
749 differentiation. *Genes Dev* **30**, 2538-2550, doi:10.1101/gad.289256.116 (2016).
- 750 34 Zhu, W., Giangrande, P. H. & Nevins, J. R. E2Fs link the control of G1/S and G2/M  
751 transcription. *EMBO J* **23**, 4615-4626, doi:10.1038/sj.emboj.7600459 (2004).
- 752 35 Hoog, G., Zarrizi, R., von Stedingk, K., Jonsson, K. & Alvarado-Kristensson, M.  
753 Nuclear localization of gamma-tubulin affects E2F transcriptional activity and S-phase  
754 progression. *FASEB J* **25**, 3815-3827, doi:10.1096/fj.11-187484 (2011).
- 755 36 Alvarez, M. J. *et al.* Functional characterization of somatic mutations in cancer using  
756 network-based inference of protein activity. *Nat Genet* **48**, 838-847,  
757 doi:10.1038/ng.3593 (2016).
- 758 37 Ding, H. *et al.* Quantitative assessment of protein activity in orphan tissues and single  
759 cells using the metaVIPER algorithm. *Nat Commun* **9**, 1471, doi:10.1038/s41467-018-  
760 03843-3 (2018).
- 761 38 Alexander, K. E. & Rizkallah, R. Aurora A Phosphorylation of YY1 during Mitosis  
762 Inactivates its DNA Binding Activity. *Sci Rep* **7**, 10084, doi:10.1038/s41598-017-  
763 10935-5 (2017).
- 764 39 Rizkallah, R., Alexander, K. E., Kassardjian, A., Luscher, B. & Hurt, M. M. The  
765 transcription factor YY1 is a substrate for Polo-like kinase 1 at the G2/M transition of  
766 the cell cycle. *PLoS One* **6**, e15928, doi:10.1371/journal.pone.0015928 (2011).
- 767 40 Schimmel, J. *et al.* Uncovering SUMOylation dynamics during cell-cycle progression  
768 reveals FoxM1 as a key mitotic SUMO target protein. *Mol Cell* **53**, 1053-1066,  
769 doi:10.1016/j.molcel.2014.02.001 (2014).
- 770 41 Faronato, M. *et al.* The deubiquitylase USP15 stabilizes newly synthesized REST and  
771 rescues its expression at mitotic exit. *Cell Cycle* **12**, 1964-1977, doi:10.4161/cc.25035  
772 (2013).



- 773 42 Yao, Z. *et al.* ZKSCAN1 gene and its related circular RNA (circZKSCAN1) both inhibit  
774 hepatocellular carcinoma cell growth, migration, and invasion but through different  
775 signaling pathways. *Mol Oncol* **11**, 422-437, doi:10.1002/1878-0261.12045 (2017).
- 776 43 McManus, M. *et al.* Hes4: A potential prognostic biomarker for newly diagnosed  
777 patients with high-grade osteosarcoma. *Pediatr Blood Cancer* **64**,  
778 doi:10.1002/pbc.26318 (2017).
- 779 44 Wang, X. *et al.* RNA sequencing analysis reveals protective role of kruppel-like factor  
780 3 in colorectal cancer. *Oncotarget* **8**, 21984-21993, doi:10.18632/oncotarget.15766  
781 (2017).
- 782 45 Islam, S. *et al.* Characterization of the single-cell transcriptional landscape by highly  
783 multiplex RNA-seq. *Genome Res* **21**, 1160-1167, doi:10.1101/gr.110882.110 (2011).
- 784 46 Jaitin, D. A. *et al.* Massively parallel single-cell RNA-seq for marker-free decomposition  
785 of tissues into cell types. *Science* **343**, 776-779, doi:10.1126/science.1247651 (2014).
- 786 47 Habib, N. *et al.* Div-Seq: Single-nucleus RNA-Seq reveals dynamics of rare adult  
787 newborn neurons. *Science* **353**, 925-928, doi:10.1126/science.aad7038 (2016).
- 788 48 Lake, B. B. *et al.* Neuronal subtypes and diversity revealed by single-nucleus RNA  
789 sequencing of the human brain. *Science* **352**, 1586-1590,  
790 doi:10.1126/science.aaf1204 (2016).
- 791 49 Kanev, K. *et al.* Proliferation-competent Tcf1+ CD8 T cells in dysfunctional populations  
792 are CD4 T cell help independent. *Proc Natl Acad Sci U S A* **116**, 20070-20076,  
793 doi:10.1073/pnas.1902701116 (2019).
- 794 50 Butler, A., Hoffman, P., Smibert, P., Papalexi, E. & Satija, R. Integrating single-cell  
795 transcriptomic data across different conditions, technologies, and species. *Nat*  
796 *Biotechnol* **36**, 411-420, doi:10.1038/nbt.4096 (2018).
- 797

Figure 1

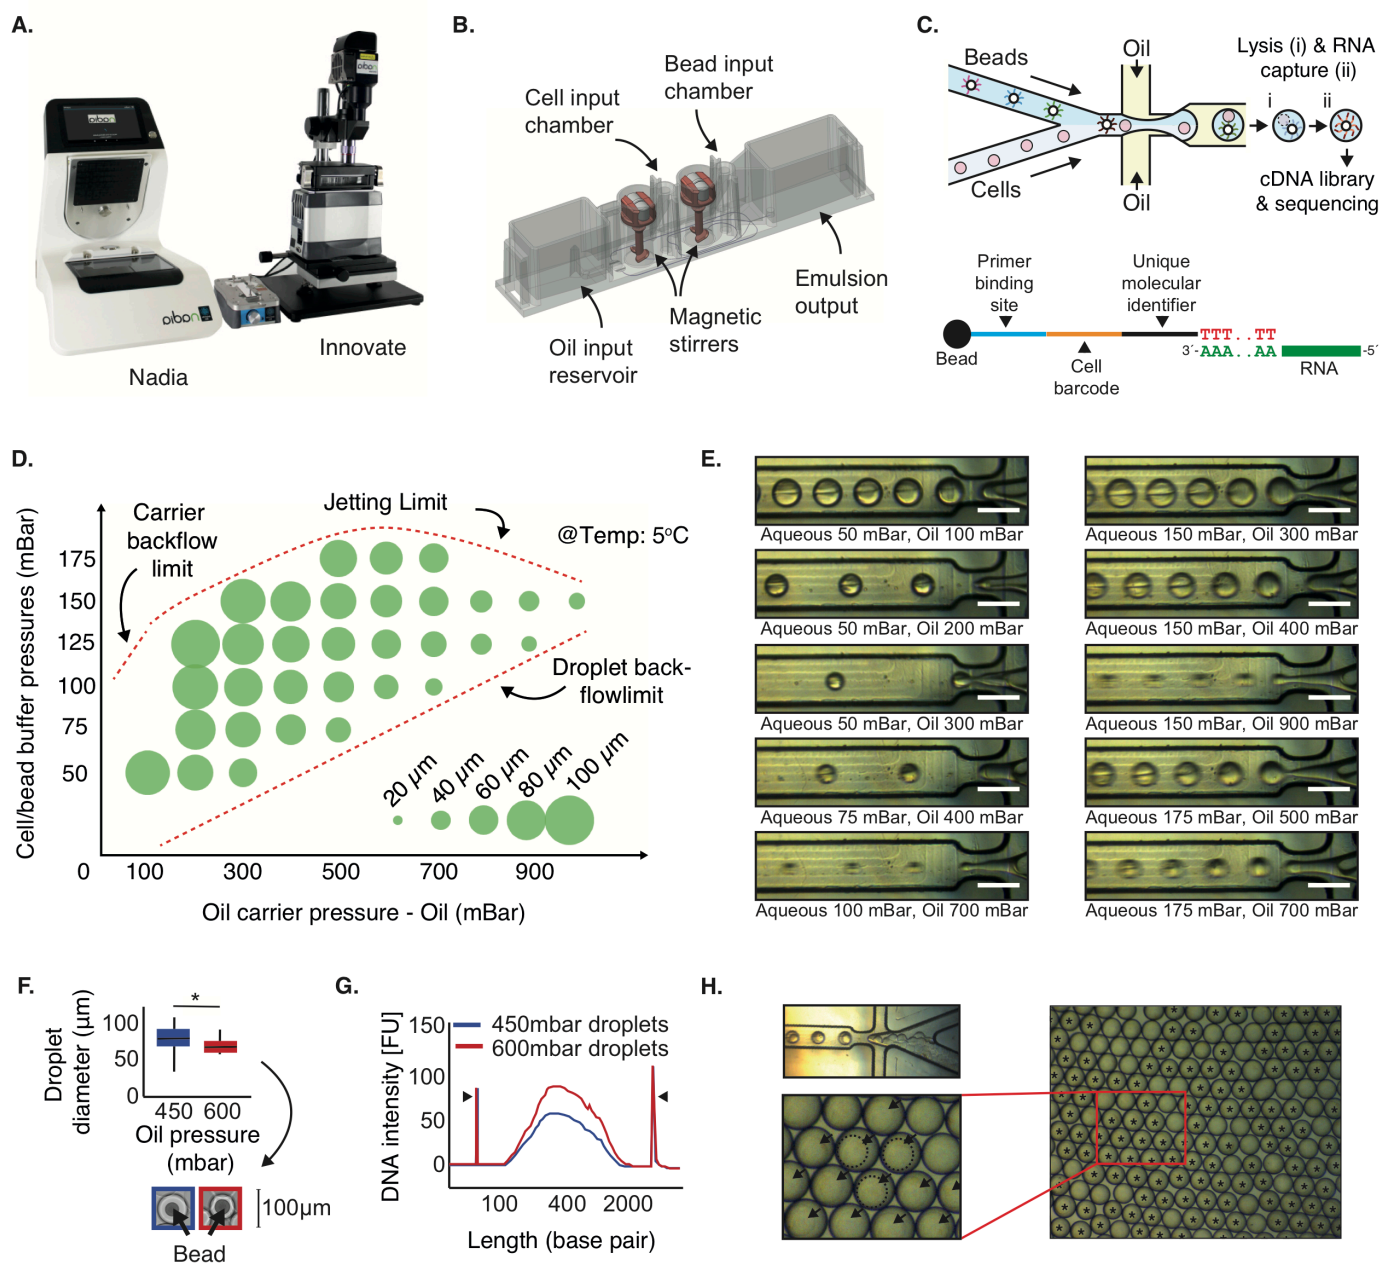

Figure 2

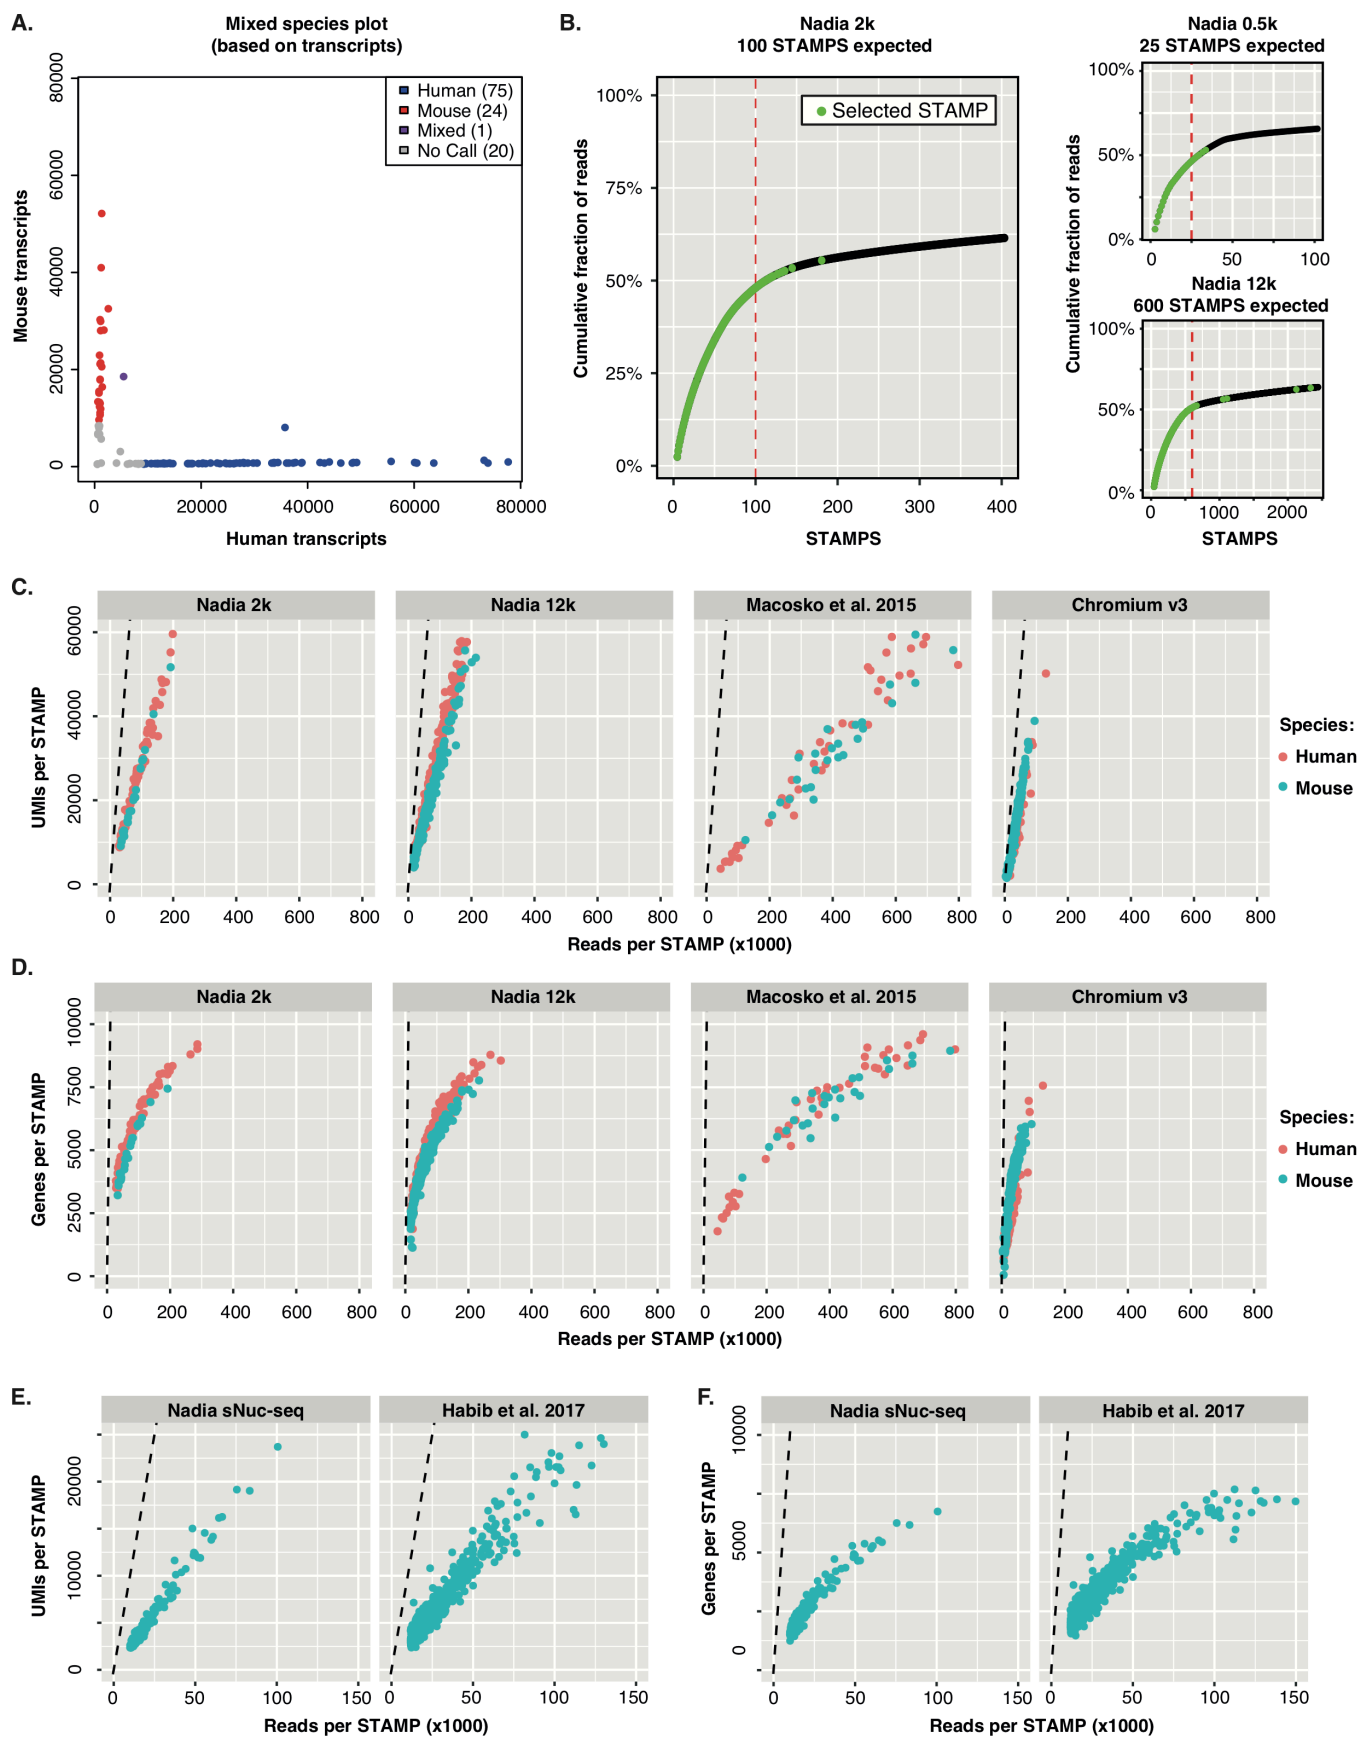

Figure 3

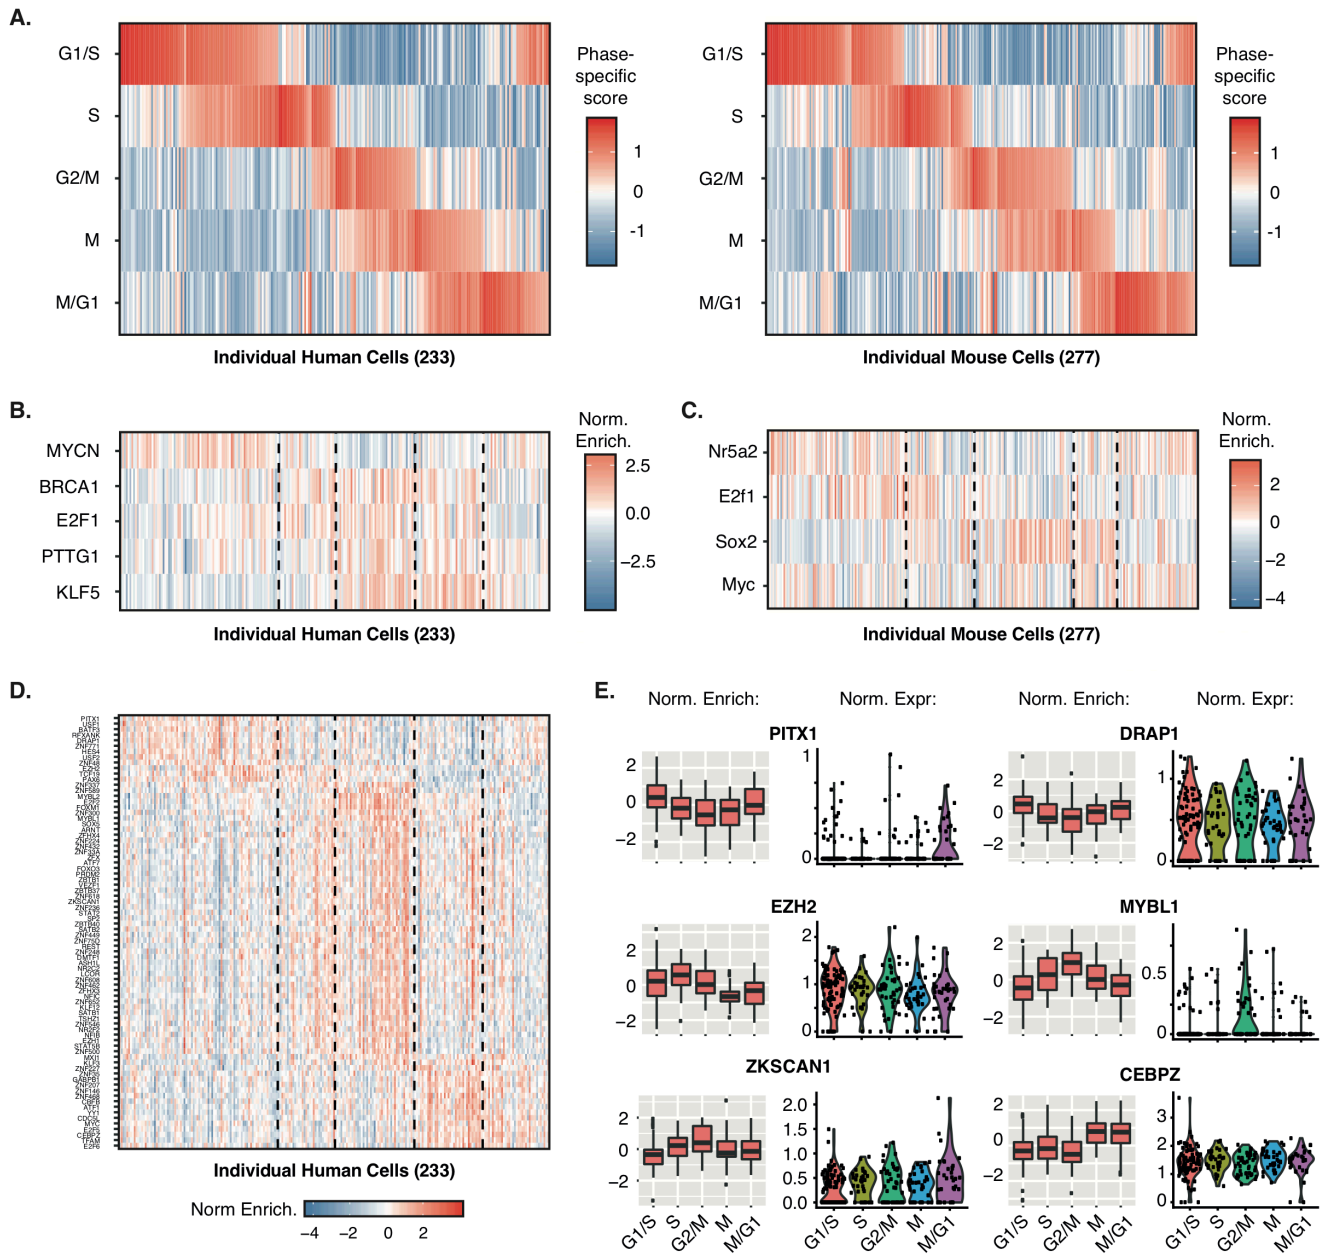

Supplementary Figure 1

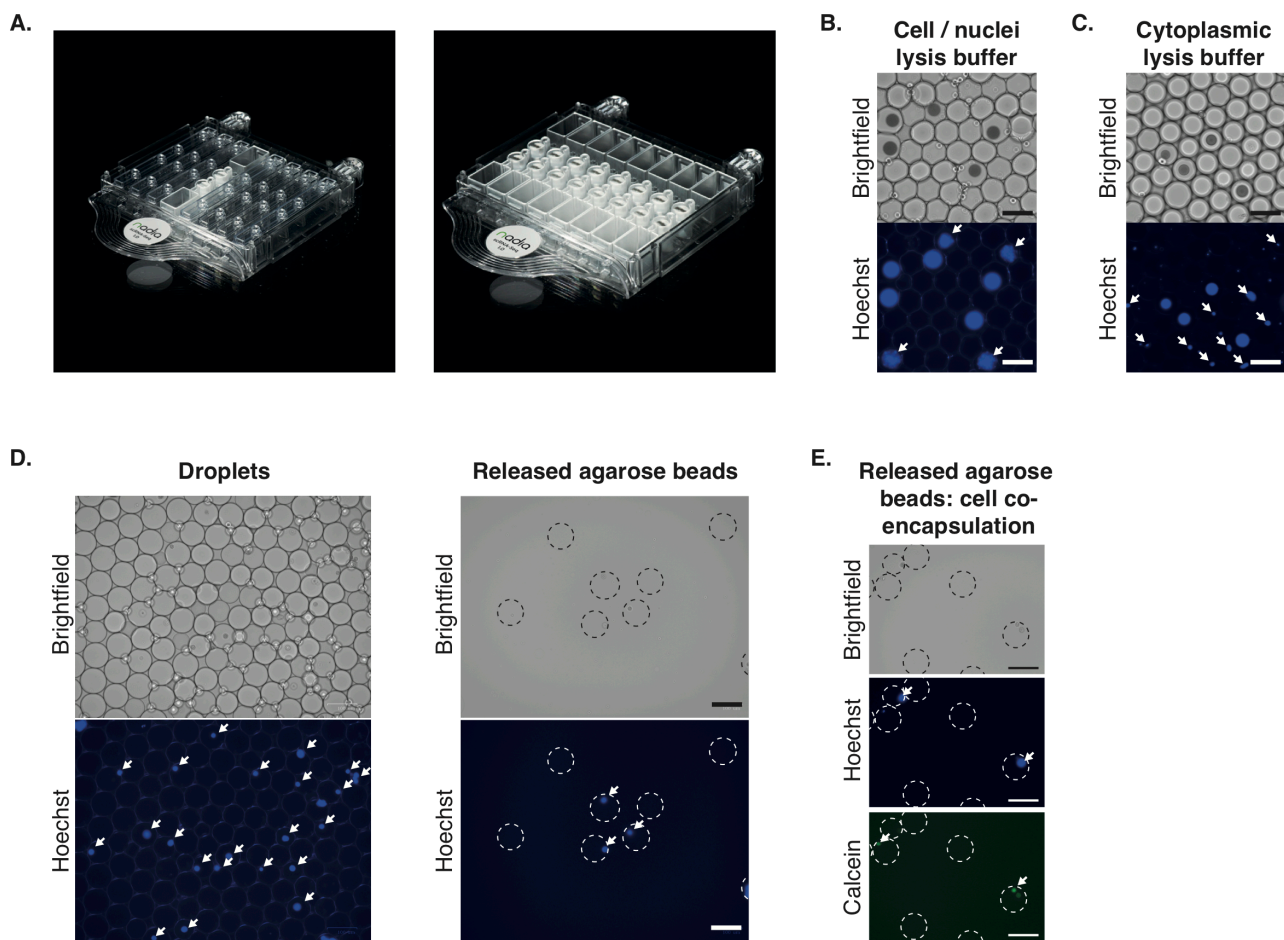

## Supplementary Figure 2

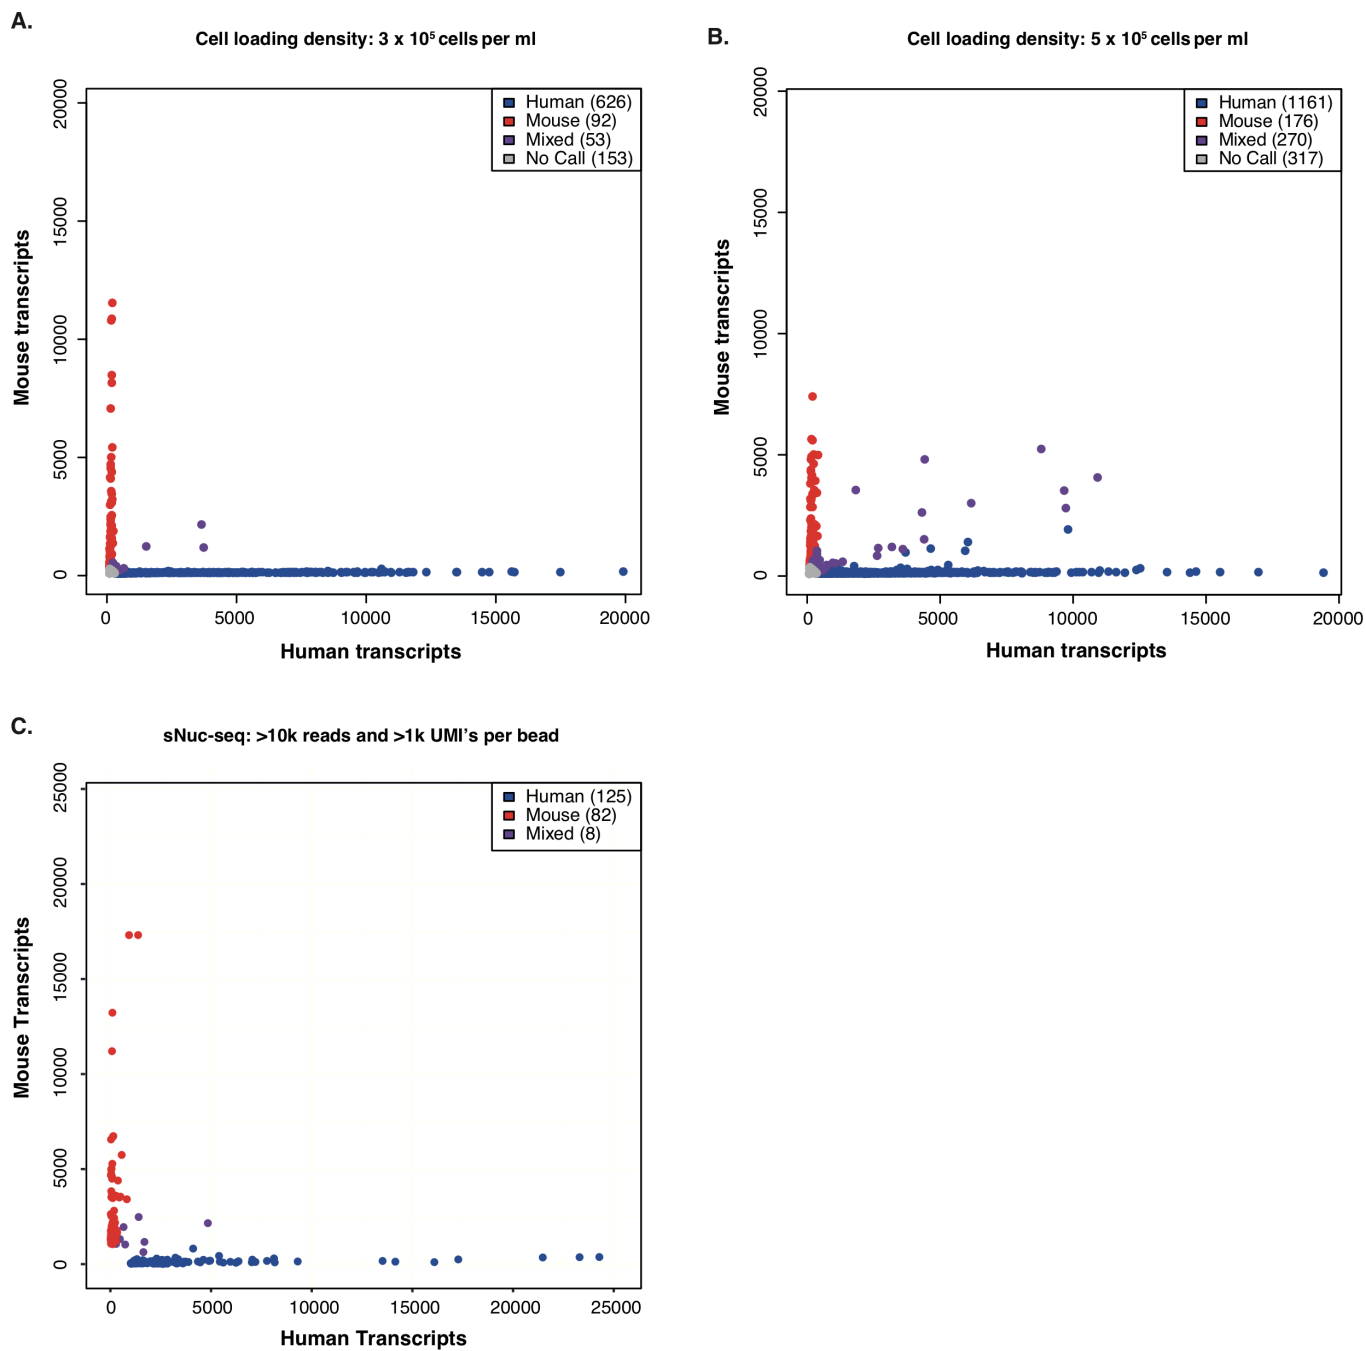

### Supplementary figure 3

A.

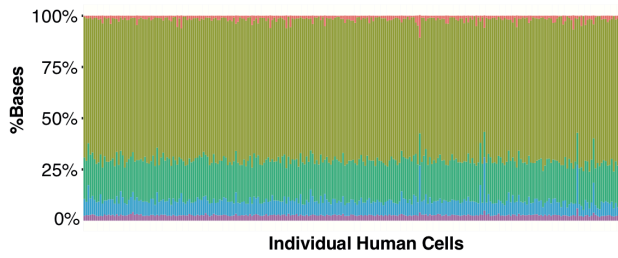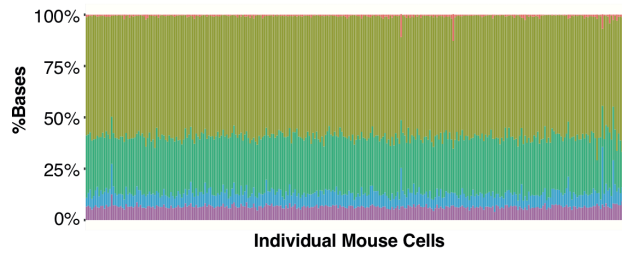

B.

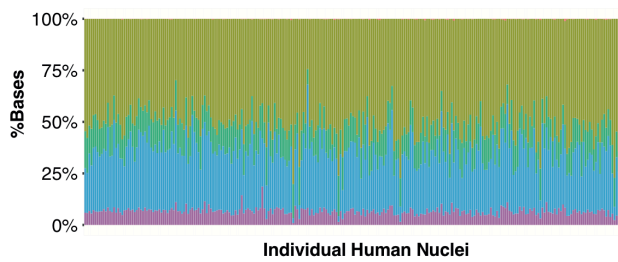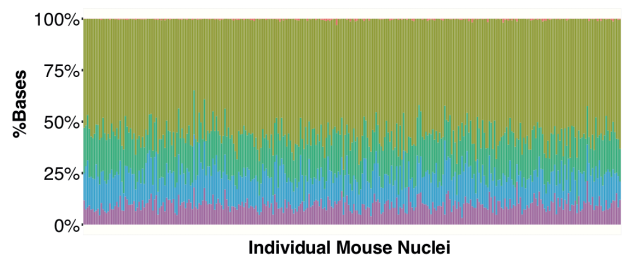

C.

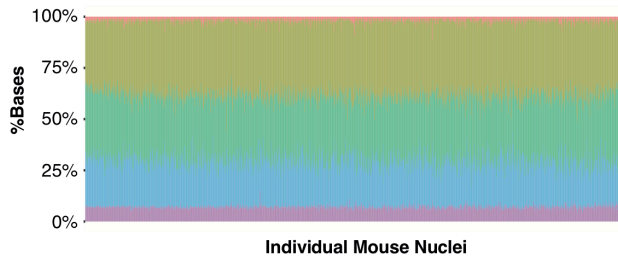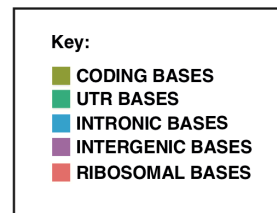

Supplementary figure 4

A.

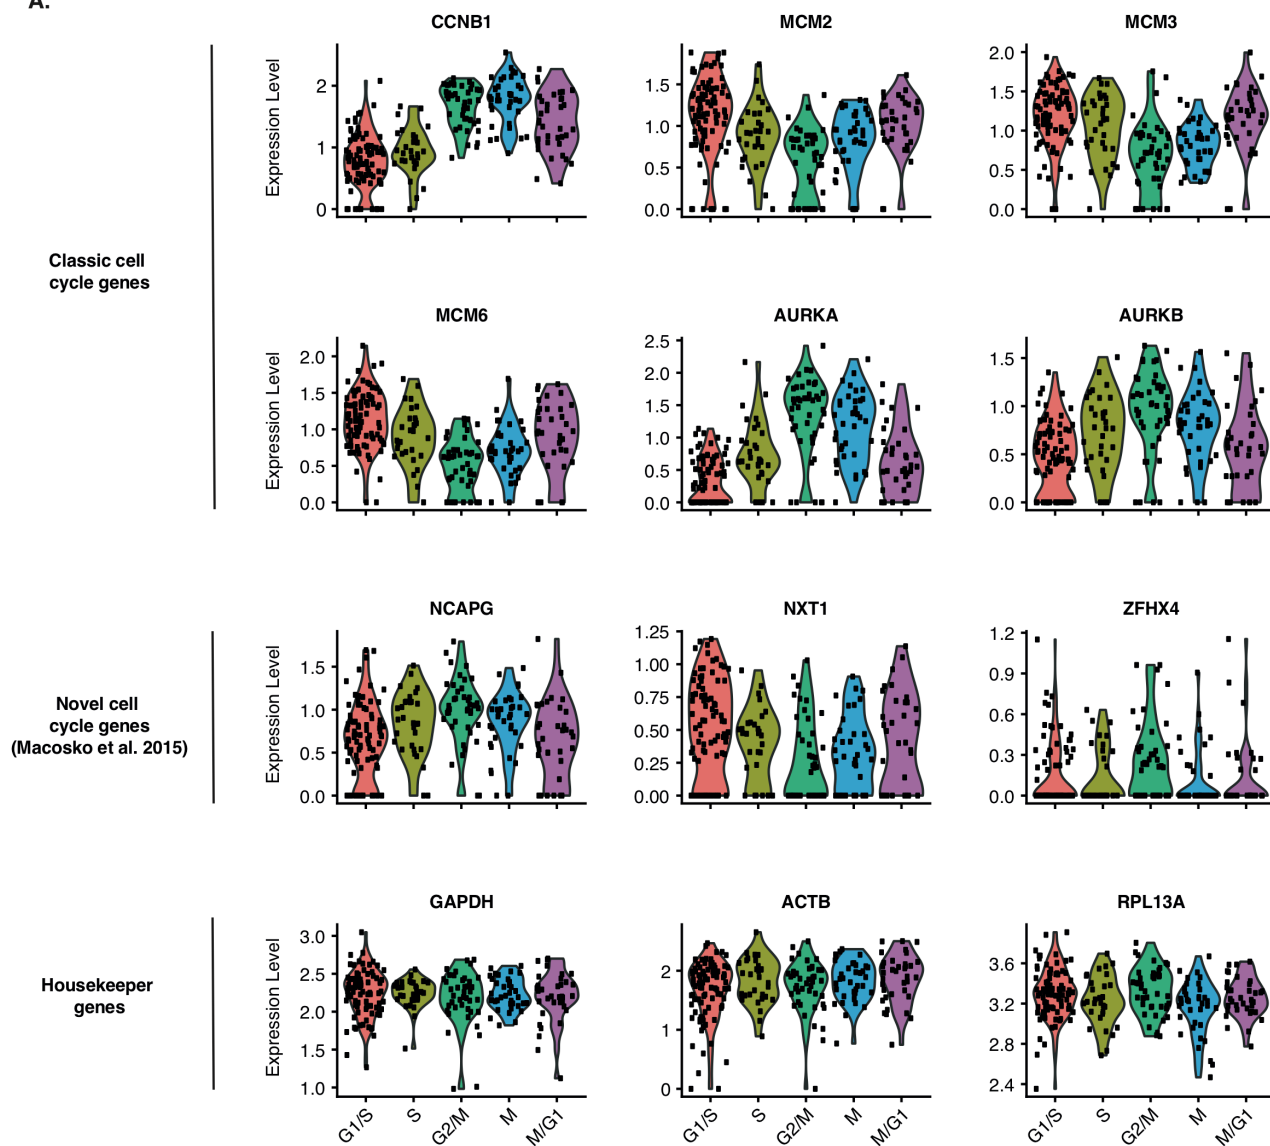



Supplementary figure 5

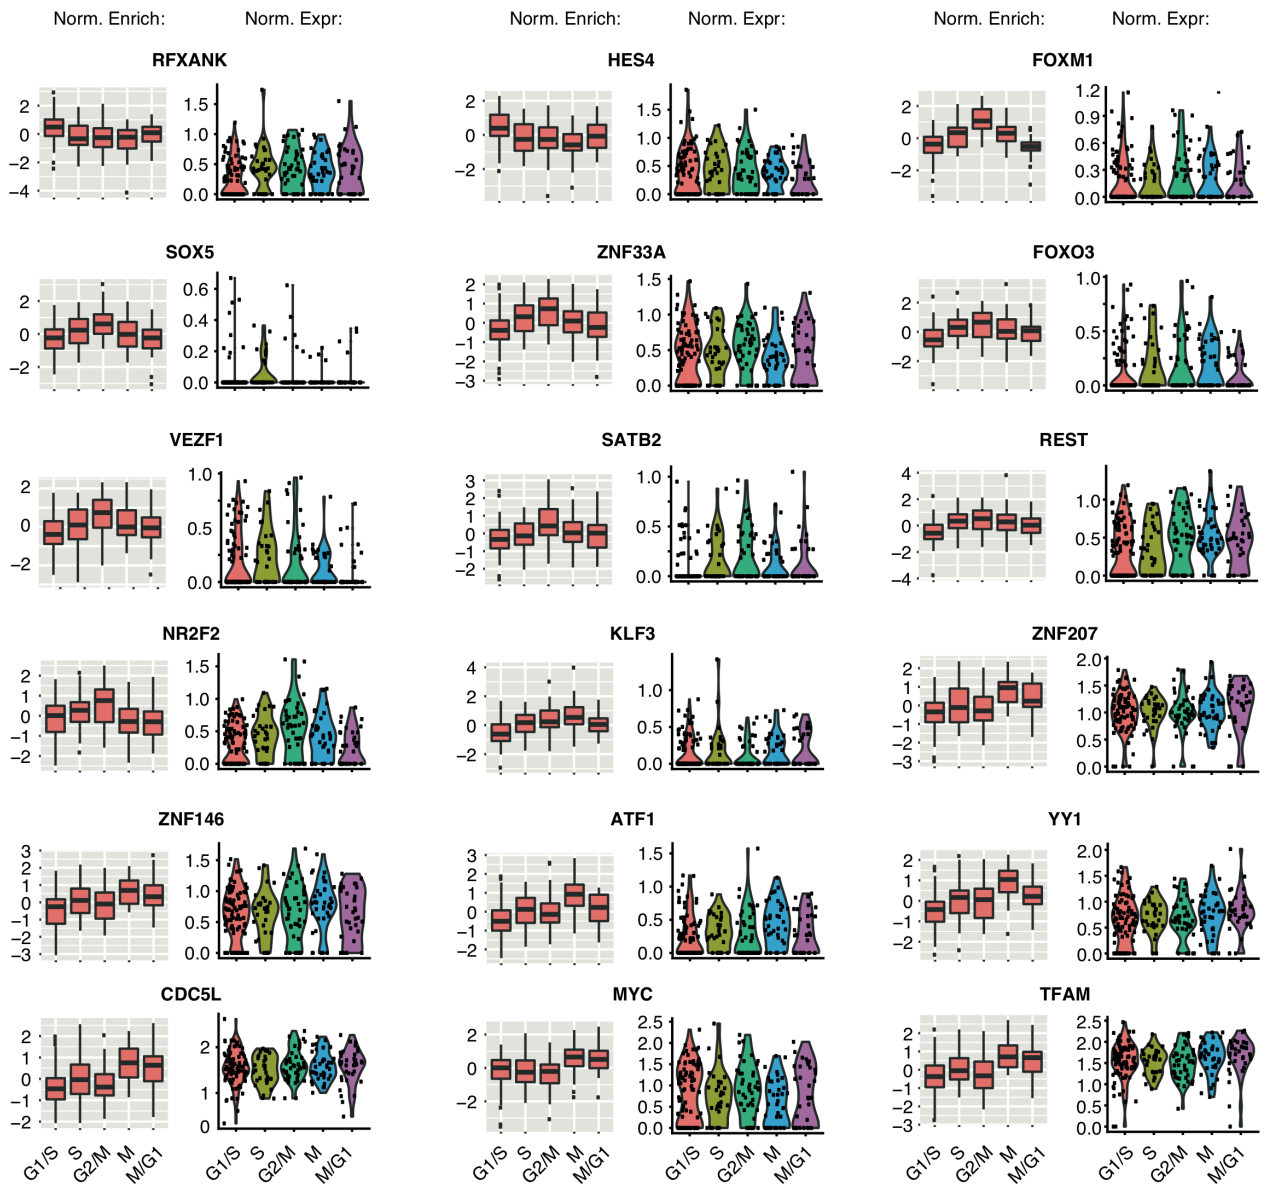

Source: https://www.biorxiv.org/content/10.1101/2020.01.06.895524v1.full.pdf
